# Supplementary material for: Health-Promoting Quality of Life at Work during the COVID-19 Pandemic: A 12-Month Longitudinal Study on the Work-Related Sense of Coherence in Acute Care Healthcare Professionals
Source: MDPI journal article supplement (doi:10.3390/ijerph19106053), 2022-05-16
Supplement: s1 [file s1]

## Supplementary Materials

**Table S1.** Results of the two-level regression with time random effects for COVID-19-related anxiety of the healthcare professionals (n = 520; observations = 2368).

| Analysis                           | Variables                                               | Model                      |      |                                                         |      |                                                         |      |
|------------------------------------|---------------------------------------------------------|----------------------------|------|---------------------------------------------------------|------|---------------------------------------------------------|------|
|                                    |                                                         | 1                          |      | 2                                                       |      | 3                                                       |      |
|                                    |                                                         | Unconditional cubic growth |      | Conditional cubic growth, 2-way cross-level interaction |      | Conditional cubic growth, 3-way cross-level interaction |      |
|                                    |                                                         | <i>b</i>                   | SE   | <i>b</i>                                                | SE   | <i>b</i>                                                | SE   |
| Fixed effects                      | Intercept                                               | 40.79***                   | 0.20 | 39.42 ***                                               | 0.92 | 39.30***                                                | 0.93 |
| Level I                            | Time                                                    | -1.05***                   | 0.21 | -1.45 ***                                               | 0.21 | -1.037***                                               | 0.21 |
|                                    | (Time) <sup>3</sup>                                     | 0.24                       | 0.06 | 0.24 ***                                                | 0.06 | 0.25***                                                 | 0.06 |
| Level II                           | Female                                                  |                            |      | 0.28                                                    | 0.30 | 0.27                                                    | 0.30 |
|                                    | Age                                                     |                            |      | 0.00                                                    | 0.02 | 0.00                                                    | 0.01 |
|                                    | No-risk population                                      |                            |      | -0.29                                                   | 0.44 | -0.28                                                   | 0.44 |
|                                    | No children                                             |                            |      | -0.44                                                   | 0.36 | -0.46                                                   | 0.36 |
|                                    | Live alone                                              |                            |      | -0.26                                                   | 0.48 | -0.25                                                   | 0.45 |
|                                    | Contact with risk population                            |                            |      | 1.91**                                                  | 0.69 | 1.95**                                                  | 0.69 |
|                                    | No relationship                                         |                            |      | 0.02                                                    | 0.45 | 0.02                                                    | 0.45 |
|                                    | Infected during study                                   |                            |      | 0.03                                                    | 0.08 | 0.03                                                    | 0.08 |
|                                    | Second-line HCP                                         |                            |      | -0.44                                                   | 0.32 | -0.26                                                   | 0.41 |
|                                    | Workplace                                               |                            |      | 0.00                                                    | 0.09 | 0.00                                                    | 0.09 |
|                                    | Sense of Coherence                                      |                            |      | -0.07***                                                | 0.02 | -0.08***                                                | 0.03 |
|                                    | (Time) <sup>3</sup> *Sense of Coherence                 |                            |      | 0.01***                                                 | 0.00 | 0.01                                                    | 0.00 |
| Cross-level                        | (Time) <sup>3</sup> *Second-line HCP                    |                            |      |                                                         |      | -0.02                                                   | 0.04 |
|                                    | Second-line HCP*Sense of Coherence                      |                            |      |                                                         |      | 0.03                                                    | 0.04 |
|                                    | (Time) <sup>3</sup> *Sense of Coherence*Second-line HCP |                            |      |                                                         |      | 0.00                                                    | 0.00 |
|                                    |                                                         |                            |      |                                                         |      |                                                         |      |
| Variance components                |                                                         | Estimate                   |      | Estimate                                                |      | Estimate                                                |      |
| Within participants (Level 1)      |                                                         | 12.80                      |      | 12.85                                                   |      | 12.81                                                   |      |
| Between participants (Level 2)     |                                                         | 8.41                       |      | 7.74                                                    |      | 7.76                                                    |      |
| Slope variance (Time)              |                                                         | 6.41                       |      | 5.85                                                    |      | 5.81                                                    |      |
| Slope variance (Time) <sup>3</sup> |                                                         | 0.77                       |      | 0.70                                                    |      | 0.70                                                    |      |

\*  $p < 0.05$ ; \*\*  $p < 0.01$ ; \*\*\*  $p < 0.001$ ; HCP, healthcare professional; SE, standard error.

**Table S2.** Results of the multilevel analysis for perceived vulnerability to COVID-19 of the healthcare professionals (n = 520; observations = 2368).

| Analysis      | Variables                    | Model                      |      |                                                         |      |                                                         |      |
|---------------|------------------------------|----------------------------|------|---------------------------------------------------------|------|---------------------------------------------------------|------|
|               |                              | 1                          |      | 2                                                       |      | 3                                                       |      |
|               |                              | Unconditional cubic growth |      | Conditional cubic growth, 2-way cross-level interaction |      | Conditional cubic growth, 3-way cross-level interaction |      |
|               |                              | <i>b</i>                   | SE   | <i>b</i>                                                | SE   | <i>b</i>                                                | SE   |
| Fixed effects | Intercept                    | 54.62***                   | 0.59 | 58.52***                                                | 2.88 | 58.55***                                                | 2.91 |
| Level I       | Time                         | 0.21                       | 0.51 | 0.20                                                    | 0.51 | 0.20                                                    | 0.51 |
|               | (Time) <sup>2</sup>          | -0.05                      | 0.15 | -0.05                                                   | 0.15 | -0.05                                                   | 0.15 |
| Level II      | Female                       |                            |      | 1.51                                                    | 0.95 | 1.52                                                    | 0.95 |
|               | Age                          |                            |      | -0.13*                                                  | 0.05 | -0.13*                                                  | 0.05 |
|               | No-risk population           |                            |      | -3.02*                                                  | 1.39 | -3.03*                                                  | 1.39 |
|               | No children                  |                            |      | -1.94                                                   | 1.11 | -1.52                                                   | 1.11 |
|               | Live alone                   |                            |      | 1.52                                                    | 1.49 | 1.49                                                    | 1.49 |
|               | Contact with risk population |                            |      | -2.20                                                   | 2.15 | -2.25                                                   | 2.15 |
|               | Relationship                 |                            |      | -0.07                                                   | 1.41 | -0.04                                                   | 1.41 |

|                                    |                                                         |          |          |          |      |
|------------------------------------|---------------------------------------------------------|----------|----------|----------|------|
|                                    | Infected during study                                   | 0.32     | 0.24     | 0.32     | 0.24 |
|                                    | Second-line HCP                                         | 1.14     | 0.98     | 1.13     | 1.26 |
|                                    | Workplace                                               | -0.16    | 0.30     | -0.16    | 0.30 |
|                                    | Sense of Coherence                                      | -0.28**  | 0.06     | -0.32*** | 0.08 |
| Cross-level                        | (Time) <sup>3</sup> *Sense of Coherence                 | 0.01**   | 0.00     | 0.02***  | 0.01 |
|                                    | (Time) <sup>3</sup> *Second-line HCP                    |          |          | 0.00     | 0.09 |
|                                    | Second-line HCP*Sense of Coherence                      |          |          | 0.09     | 0.12 |
|                                    | (Time) <sup>3</sup> *Sense of Coherence*Second-line HCP |          |          |          |      |
| Variance components                |                                                         | Estimate | Estimate | Estimate |      |
| Within participants (Level 1)      |                                                         | 58.85    | 58.63    | 58.62    |      |
| Between participants (Level 2)     |                                                         | 129.18   | 119.28   | 119.66   |      |
| Slope variance (Time)              |                                                         | 53.80    | 54.34    | 54.46    |      |
| Slope variance (Time) <sup>3</sup> |                                                         | 6.60     | 6.55     | 6.55     |      |

\*  $p < 0.05$ ; \*\*  $p < 0.01$ ; \*\*\*  $p < 0.001$ ; HCP, healthcare professional; SE, standard error; MarginalR2 0.72; 3-fach Interaktion  $p = 0.097$ .

**Table S3.** Results of the multilevel analysis for COVID-19–related depressiveness of the healthcare professionals (n = 520; observations = 2372).

| Analysis                           | Variables                                               | Model                      |          |                                                         |          |                                                         |          |
|------------------------------------|---------------------------------------------------------|----------------------------|----------|---------------------------------------------------------|----------|---------------------------------------------------------|----------|
|                                    |                                                         | 1                          |          | 2                                                       |          | 3                                                       |          |
|                                    |                                                         | Unconditional cubic growth |          | Conditional cubic growth, 2-way cross-level interaction |          | Conditional cubic growth, 3-way cross-level interaction |          |
|                                    |                                                         | <i>b</i>                   | SE       | <i>b</i>                                                | SE       | <i>b</i>                                                | SE       |
| Fixed effects                      | Intercept                                               | 5.50***                    | 0.21     | 5.21***                                                 | 0.93     | 5.44***                                                 | 0.94     |
| Level I                            | Time                                                    | -0.62***                   | 0.19     | -0.62***                                                | 0.19     | -0.62***                                                | 0.19     |
|                                    | (Time) <sup>3</sup>                                     | 0.16**                     | 0.05     | 0.16**                                                  | 0.05     | 0.12*                                                   | 0.05     |
| Level II                           | Female                                                  |                            |          | 1.05***                                                 | 0.31     | 1.04***                                                 | 0.31     |
|                                    | Age                                                     |                            |          | -0.02                                                   | 0.02     | -0.02                                                   | 0.02     |
|                                    | No-risk population                                      |                            |          | -1.30**                                                 | 0.45     | -1.30**                                                 | 0.45     |
|                                    | No children                                             |                            |          | 0.13                                                    | 0.36     | 0.11                                                    | 0.36     |
|                                    | Live alone                                              |                            |          | -0.05                                                   | 0.48     | -0.04                                                   | 0.48     |
|                                    | Contact with risk population                            |                            |          | -1.30                                                   | 0.69     | 0.57                                                    | 0.69     |
|                                    | Relationship                                            |                            |          | -0.21                                                   | 0.46     | -0.43                                                   | 0.46     |
|                                    | Infected during study                                   |                            |          | 0.21**                                                  | 0.08     | 0.21**                                                  | 0.08     |
|                                    | Second-line HCP                                         |                            |          | -0.10                                                   | 0.32     | -0.71                                                   | 0.40     |
|                                    | Workplace                                               |                            |          | -0.04                                                   | 0.10     | -0.03                                                   | 0.10     |
|                                    | Sense of Coherence                                      |                            |          | -0.19***                                                | 0.02     | -0.19***                                                | 0.03     |
| Cross-level                        | (Time) <sup>2</sup> *Sense of Coherence                 |                            |          | 0.01***                                                 | 0.00     | 0.01***                                                 | 0.00     |
|                                    | (Time) <sup>2</sup> *Second-line HCP                    |                            |          |                                                         |          | 0.09**                                                  | 0.04     |
|                                    | Second-line HCP*Sense of Coherence                      |                            |          |                                                         |          | 0.02                                                    | 0.04     |
|                                    | (Time) <sup>2</sup> *Sense of Coherence*Second-line HCP |                            |          |                                                         |          | 0.00                                                    | 0.00     |
| Variance components                |                                                         | Estimate                   | Estimate | Estimate                                                | Estimate | Estimate                                                | Estimate |
| Within participants (Level 1)      |                                                         | 10.56                      | 10.49    | 10.49                                                   |          |                                                         |          |
| Between participants (Level 2)     |                                                         | 13.56                      | 9.74     | 9.70                                                    |          |                                                         |          |
| Slope variance                     |                                                         | 3.65                       | 3.82     | 3.79                                                    |          |                                                         |          |
| Slope variance (Time) <sup>3</sup> |                                                         | 0.57                       | 0.56     | 0.55                                                    |          |                                                         |          |

\*,  $p < 0.05$ ; \*\*,  $p < 0.01$ ; \*\*\*,  $p < 0.001$ ; HCP, healthcare professional; SE, standard error; Conditional R2 = 0.591; 3-fach interaction  $p = 0.956$ .

```

$contrasts
contrast      estimate      SE df t.ratio p.value
0 - 9.43      -0.459 0.0661 503 -6.947 <.0001
0 - -9.43      0.459 0.0661 503  6.947 <.0001
9.43 - -9.43   0.918 0.1322 503  6.947 <.0001

```

Results are averaged over the levels of: Liner, Gender, Children, Household  
Degrees-of-freedom method: kenward-roger  
P value adjustment: tukey method for comparing a family of 3 estimates

**Table S4.** Results of the multilevel analysis for COVID-19-related psychological trauma symptomatology of the healthcare professionals (n = 520; observations = 2371).

| Analysis                           | Variables                               | Model                      |      |                                                         |      |                                                         |      |
|------------------------------------|-----------------------------------------|----------------------------|------|---------------------------------------------------------|------|---------------------------------------------------------|------|
|                                    |                                         | 1                          |      | 2                                                       |      | 3                                                       |      |
|                                    |                                         | Unconditional cubic growth |      | Conditional cubic growth, 2-way cross-level interaction |      | Conditional cubic growth, 3-way cross-level interaction |      |
|                                    |                                         | <i>b</i>                   | SE   | <i>b</i>                                                | SE   | <i>b</i>                                                | SE   |
| Fixed effects                      | Intercept                               | 8.84***                    | 0.22 | 8.26***                                                 | 0.97 | 8.30***                                                 | 0.98 |
| Level I                            | Time                                    | -1.49***                   | 0.21 | -1.48***                                                | 0.21 | -1.48***                                                | 0.21 |
|                                    | (Time) <sup>2</sup>                     | 0.31***                    | 0.06 | 0.31***                                                 | 0.06 | 0.30***                                                 | 0.06 |
| Level II                           | Female                                  |                            |      | 0.63*                                                   | 0.32 | 0.63                                                    | 0.32 |
|                                    | Age                                     |                            |      | -0.04*                                                  | 0.02 | -0.04*                                                  | 0.02 |
|                                    | No-risk population                      |                            |      | -0.83                                                   | 0.47 | -0.82                                                   | 0.47 |
|                                    | No children                             |                            |      | -0.40                                                   | 0.37 | -0.42                                                   | 0.38 |
|                                    | Live alone                              |                            |      | 0.36                                                    | 0.50 | 0.37                                                    | 0.50 |
|                                    | Contact with risk population            |                            |      | 0.94                                                    | 0.72 | 0.96                                                    | 0.72 |
|                                    | Relationship                            |                            |      | -0.64                                                   | 0.48 | -0.65                                                   | 0.48 |
|                                    | Infected during study                   |                            |      | 0.19*                                                   | 0.08 | 0.19*                                                   | 0.08 |
|                                    | Second-line HCP                         |                            |      | -0.20                                                   | 0.33 | -0.36                                                   | 0.43 |
|                                    | Workplace                               |                            |      | -0.01                                                   | 0.10 | -0.01                                                   | 0.10 |
|                                    | Sense of Coherence                      |                            |      | -0.19***                                                | 0.02 | -0.20***                                                | 0.03 |
| Cross-level                        | (Time) <sup>3</sup> *Sense of Coherence |                            |      | 0.01***                                                 | 0.00 | 0.01***                                                 | 0.00 |
|                                    | (Time) <sup>3</sup> *Second-line HCP    |                            |      |                                                         |      | 0.02                                                    | 0.04 |
|                                    | Second-line HCP*Sense of Coherence      |                            |      |                                                         |      | 0.03                                                    | 0.04 |
|                                    | (Time) <sup>3</sup> *Sense of Coherence |                            |      |                                                         |      | 0.00                                                    | 0.00 |
|                                    | Coherence*Second-line HCP               |                            |      |                                                         |      |                                                         |      |
| Variance components                |                                         | Estimate                   |      | Estimate                                                |      | Estimate                                                |      |
| Within participants (Level 1)      |                                         | 13.47                      |      | 13.45                                                   |      | 13.44                                                   |      |
| Between participants (Level 2)     |                                         | 12.61                      |      | 9.66                                                    |      | 9.70                                                    |      |
| Slope variance (Time)              |                                         | 5.45                       |      | 5.50                                                    |      | 5.54                                                    |      |
| Slope Variance (Time) <sup>3</sup> |                                         | 0.70                       |      | 0.68                                                    |      | 0.68                                                    |      |

\*,  $p < 0.05$ ; \*\*,  $p < 0.01$ ; \*\*\*,  $p < 0.001$ ; HCP, healthcare professional; SE, standard error; Conditional R2: 0.543; 3-fach Interaktion  $p = 0.757$ .

```

$contrasts
contrast      estimate      SE df t.ratio p.value
0 - 9.43      -0.466 0.0673 503 -6.929 <.0001
0 - -9.43      0.466 0.0673 503  6.929 <.0001
9.43 - -9.43   0.933 0.1346 503  6.929 <.0001

```

Results are averaged over the levels of: Liner, Gender, Children, Household  
Degrees-of-freedom method: kenward-roger  
P value adjustment: tukey method for comparing a family of 3 estimates
